# Supplementary material
Source: publisher site journal article supplement (https://www.spandidos-publications.com/3149/downloadSupplementary)

Figure S1. Transfection efficiencies of miR-9-3p mimic, miR-9-3p inhibitor, IGF1R overexpression and DUXAP8 overexpression in hepatocellular carcinoma cells. Transfection efficiency of (A) miR-9-3p mimic, (B) miR-9-3p inhibitor, (C) pcDNA3.1-IGF1R and (D) pcDNA3.1-DUXAP8 in SK-HEP-1 and Huh-7 cells. n=3. \*\*P<0.01. miR, microRNA; IGF1R, insulin-like growth factor 1 receptor; DUXAP8, double homeobox A pseudogene 8; NC, negative control.

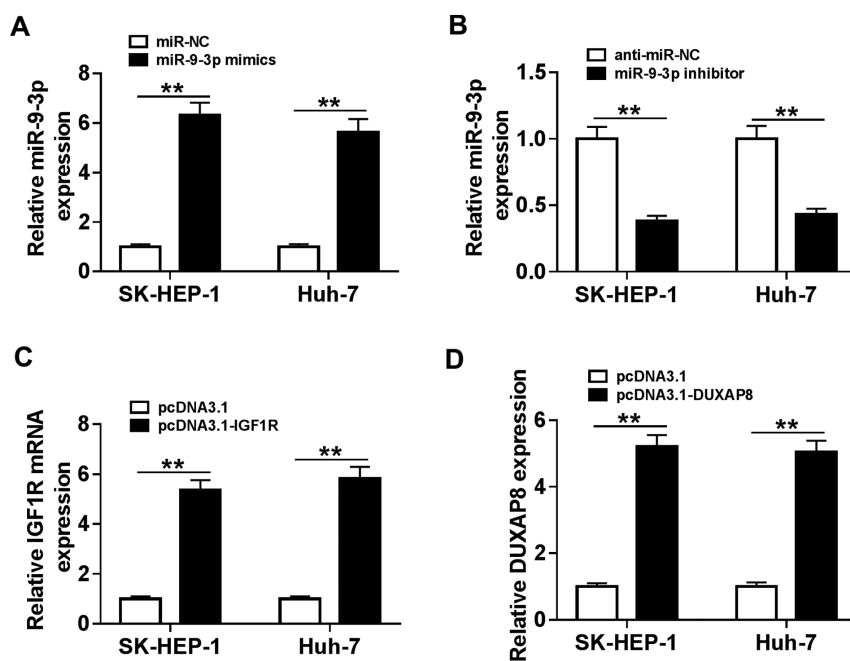

Figure S2. Pan-cancer analysis was performed to detect the correlation among DUXAP8, IGF1R and miR-9-3p in LIHC samples. DUXAP8, double homeobox A pseudogene 8; IGF1R, insulin-like growth factor 1 receptor; miR, microRNA; LIHC, liver hepatocellular carcinoma.

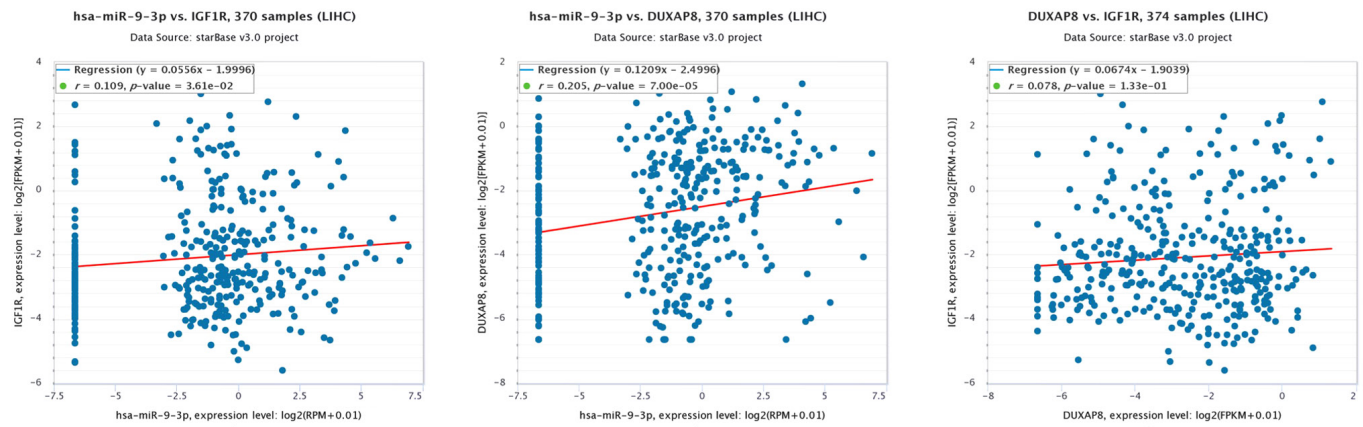

Figure S3. Representative images of Transwell migration and invasion assays. Cell (A) migration and (B) invasion in si-DUXAP8- and miR-9-3p inhibitor-transfected SK-HEP-1 and Huh-7 cells. Cell (C) migration and (D) invasion in miR-9-3p mimics- and pcDNA3.1-IGF1R-transfected SK-HEP-1 and Huh-7 cells. si, small interfering RNA; DUXAP8, double homeobox A pseudo-gene 8; miR, microRNA; IGF1R, insulin-like growth factor 1 receptor; NC, negative control.

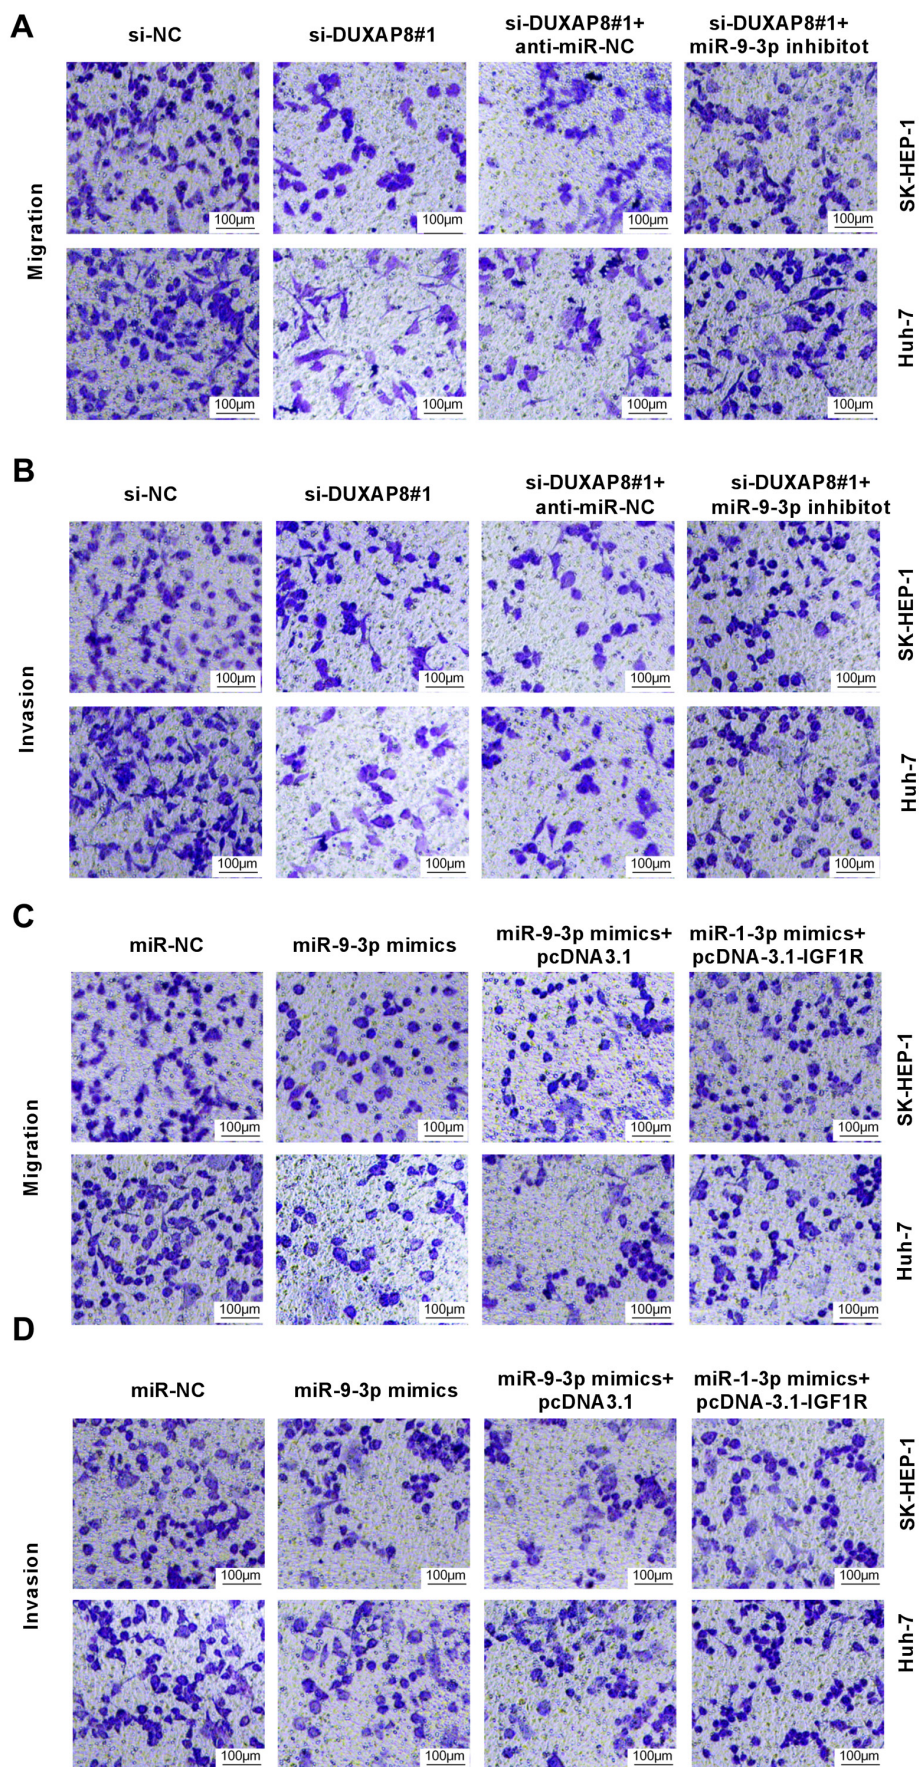

Supplement: Supplementary file 1 [file downloadSupplementary]
